# Supplementary material
Source: bioRxiv or medRxiv preprint supplement (https://medrxiv.org/highwire/filestream/78554/field_highwire_adjunct_files/0/2020.04.17.20064907-1.pdf)
Supplement: Supplementary file [file 2020.04.17.20064907-1.pdf]

**Supplementary Table 1.** Information of the 87 RT-qPCR confirmed COVID-19 patients.

| <b>Patients No.</b> | <b>Disease severity</b> | <b>Underlying disease*</b> |
|---------------------|-------------------------|----------------------------|
| 1                   | Critical (ICU)          | 1, 2, 3                    |
| 2                   | Critical (ICU)          | 4, 5, 6                    |
| 3                   | Critical (ICU)          | 7, 4, 8, 9                 |
| 4                   | Critical (ICU)          | 10, 11                     |
| 5                   | Critical (ICU)          | 5, 12                      |
| 6                   | Severe                  | 4                          |
| 7                   | Severe                  | none                       |
| 8                   | Severe                  | none                       |
| 9                   | Severe                  | 4                          |
| 10                  | Severe                  | none                       |
| 11                  | Severe                  | none                       |
| 12                  | Severe                  | 4, 13                      |
| 13                  | Severe                  | 1                          |
| 14                  | Severe                  | none                       |
| 15                  | Severe                  | none                       |
| 16                  | Severe                  | 4, 7, 10, 14, 15           |
| 17                  | Severe                  | 4                          |
| 18                  | Severe                  | 4                          |
| 19                  | Severe                  | 4, 10, 16                  |
| 20                  | Severe                  | none                       |
| 21                  | Severe                  | none                       |
| 22                  | Severe                  | 17                         |
| 23                  | Moderate                | none                       |
| 24                  | Moderate                | none                       |
| 25                  | Moderate                | none                       |
| 26                  | Moderate                | none                       |
| 27                  | Moderate                | 18                         |
| 28                  | Moderate                | none                       |
| 29                  | Moderate                | 19, 5                      |
| 30                  | Moderate                | none                       |
| 31                  | Moderate                | 20, 21, 22                 |
| 32                  | Moderate                | 4, 10, 19                  |
| 33                  | Moderate                | none                       |
| 34                  | Moderate                | none                       |
| 35                  | Moderate                | 19                         |
| 36                  | Moderate                | 4                          |
| 37                  | Moderate                | 10, 1, 23                  |
| 38                  | Moderate                | none                       |
| 39                  | Moderate                | none                       |
| 40                  | Moderate                | none                       |
| 41                  | Moderate                | 19, 20                     |
| 42                  | Moderate                | 4                          |

---

|    |          |              |
|----|----------|--------------|
| 43 | Moderate | 24           |
| 44 | Moderate | 25           |
| 45 | Moderate | none         |
| 46 | Moderate | none         |
| 47 | Moderate | 3, 4, 10, 26 |
| 48 | Moderate | none         |
| 49 | Moderate | none         |
| 50 | Moderate | none         |
| 51 | Moderate | 27           |
| 52 | Moderate | 4, 28        |
| 53 | Moderate | none         |
| 54 | Moderate | none         |
| 55 | Moderate | 4, 10, 29    |
| 56 | Moderate | none         |
| 57 | Moderate | none         |
| 58 | Moderate | 4,30         |
| 59 | Moderate | none         |
| 60 | Moderate | none         |
| 61 | Moderate | none         |
| 62 | Moderate | none         |
| 63 | Moderate | none         |
| 64 | Moderate | 31, 32       |
| 65 | Moderate | 10           |
| 66 | Moderate | none         |
| 67 | Moderate | none         |
| 68 | Moderate | 33           |
| 69 | Moderate | none         |
| 70 | Moderate | 1            |
| 71 | Moderate | none         |
| 72 | Moderate | none         |
| 73 | Moderate | none         |
| 74 | Moderate | 1            |
| 75 | Moderate | none         |
| 76 | Moderate | none         |
| 77 | Moderate | none         |
| 78 | Moderate | none         |
| 79 | Mild     | none         |
| 80 | Mild     | none         |
| 81 | Mild     | none         |
| 82 | Mild     | none         |
| 83 | Mild     | 4,34         |
| 84 | Mild     | 4            |
| 85 | Mild     | none         |
| 86 | Mild     | none         |

---

Among these COVID-19 patients, five were critical and admitted to the ICU, one was died of cerebral hemorrhage after stroke. Seventeen patients had severe COVID-19, and all of whom required oxygen supplementation. Fifty-six patients had moderate and nine patients had mild COVID-19. The median age of patients was 48 years (range 21–91), and the average age was 47.4 years. Thirty-seven (42.5%) patients had underline illnesses; the most common one was hypertension in 18 patients (20.7%). A total 216 serum samples were taken from the 87 COVID-19 patients, 56 (64.4%), 38 (43.7%), 22 (25.3%) and 10 (11.5%) patients were taken blood for more than 2, 3, 4 and 5 times, respectively.

\*Underlying illness: 1. Hepatitis B; 2. Postoperative hepatocellular carcinoma; 3. Respiratory failure; 4. Hypertension; 5. Cerebral infarction; 6. Upper gastrointestinal bleeding; 7. Coronary heart disease; 8. Cholecystectomy; 9. Benign prostatic hyperplasia; 10. Diabetes; 11. 1. Hepatitis B; 2. Postoperative hepatocellular carcinoma; 3. Respiratory failure; 4. Hypertension; 5. Cerebral infarction; 6. Upper gastrointestinal bleeding; 7. Coronary heart disease; 8. Cholecystectomy; 9. Benign prostatic hyperplasia; 10. Diabetes; 11. Rheumatoid Arthritis; 12. Hernia surgery; 13. Lower extremity arterial occlusion; 14. Heart valve disease; 15. Atrial fibrillation; 16. Expansion; 17. Car accident caused multiple soft tissue, intracranial hemorrhage, and improved after conservative; 18. Chronic gastritis; 19. Hyperlipidemia 20. Leukopenia; 21. Anemia; 22. Sinus tachycardia; 23. Fatty Liver; 24. Proteinuria; 25. Hyperthyroidism; 26. Hypoproteinemia; 27. Uremia; 28. Left nephrectomy; 29. Breast cancer; 30. Parkinson; 31. Frozen shoulder; 32. Rheumatism; 33. Nasal drip syndrome; 34. Hyperuricemia.

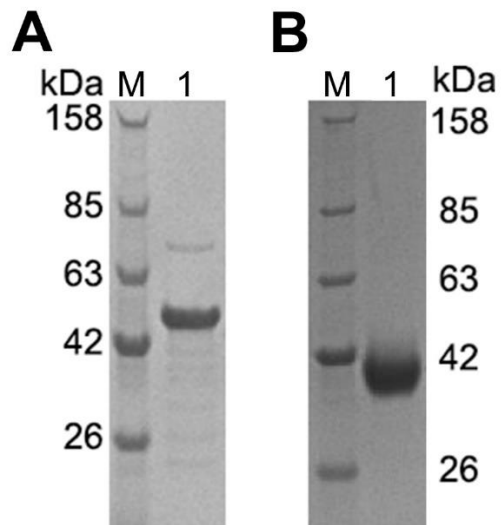

**Supplementary Figure 1.** Purification of recombinant SARS-CoV-2 nucleocapsid protein (NP, A) and receptor-binding domain (RBD, B) of the spike protein. After SDS-PAGE separation based on molecular weight (kDa) together with protein size markers (M), the proteins were stained with Coomassie Blue. A is staining of purified NP (predicted molecular mass of 49.5 kDa). B is staining of purified RBD (predicted molecular mass of 30.3 kDa).

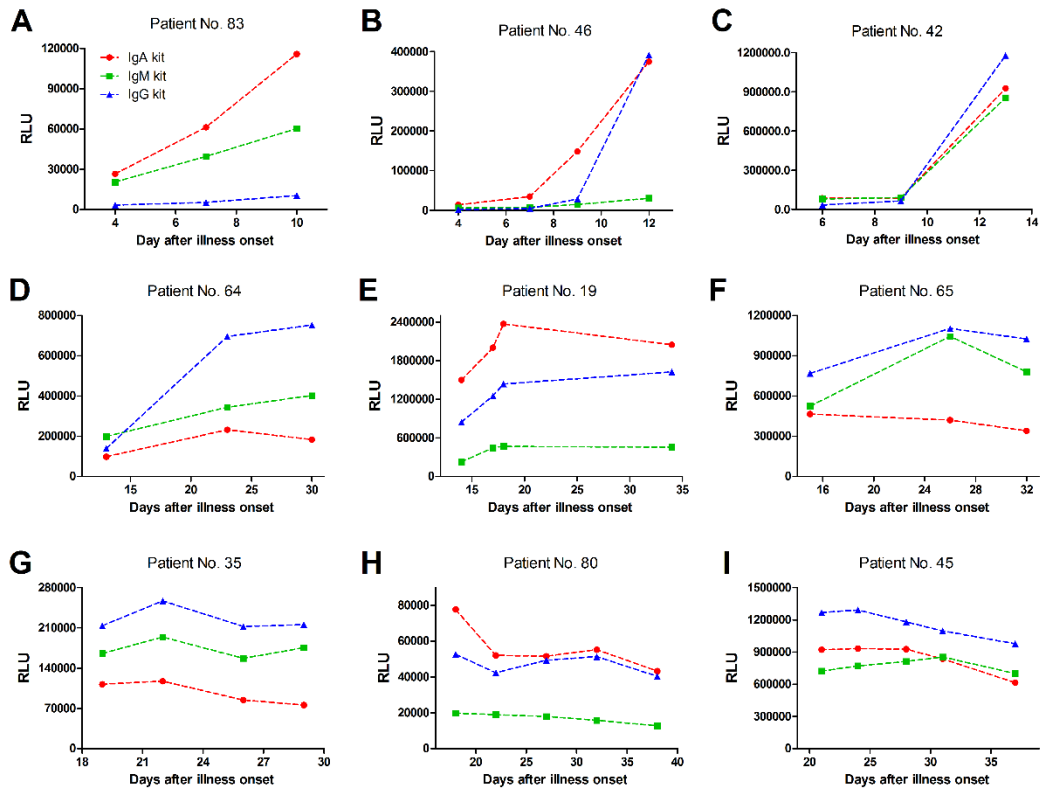

**Supplementary Figure 2.** Representative testing results of sera collected at consecutive time points after illness onset by RBD-specific kits (IgA, red; IgM green; and IgG, blue). A-I were testing results of sera from nine individual COVID-19 patients.

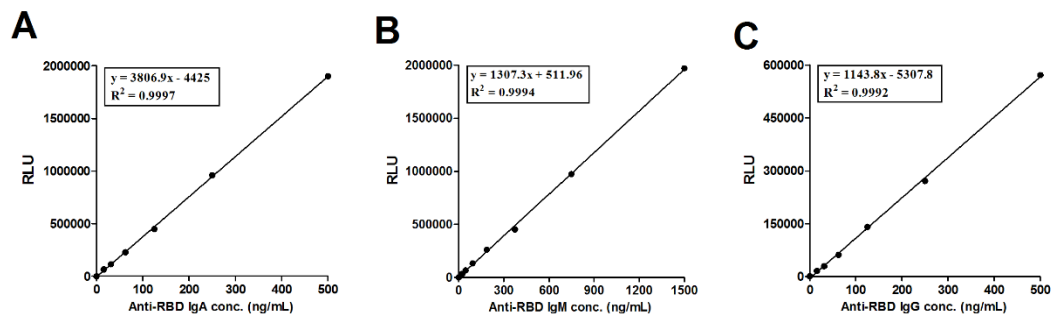

**Supplementary Figure 3.** Standard curves for antibody concentration vs. RLU. Standard curves were constructed based on immunoassay of 7-8 concentrations of anti-RBD IgA (A) or IgM (B) or IgG (C) antibodies purified from a serum pool of SARS-CoV-2 infected patients.

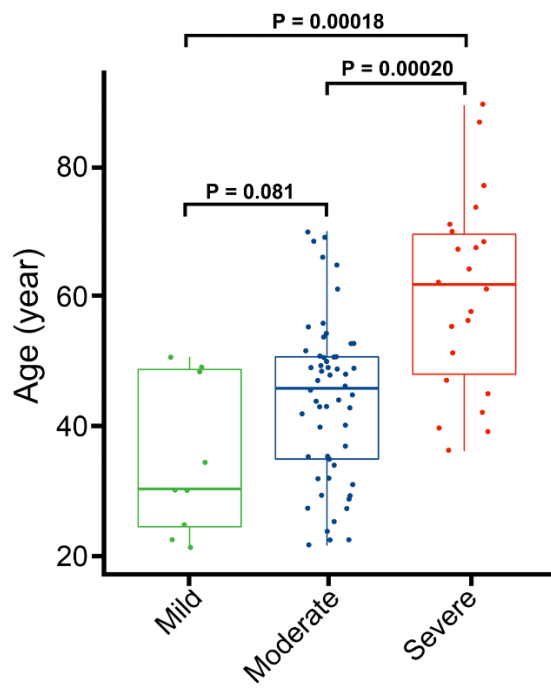

**Supplementary Figure 4.** Correlation between patient age and disease severity. Mild: 9; moderate: 56, and severe: 22 patients.
